# Supplementary material
Source: publisher figshare collection journal article supplement (https://gsajournals.figshare.com/ndownloader/files/26649995)
Supplement: Supplementary file 1 [file 26649995]

library(dplyr)  
library(tidyverse)
library(readxl)
library(purrr)
library(rstatix)
library(numform)
library(scales)
library(GGally)
library(plotrix)

#change to where you have the data file, or to the tab in supplemental file 3
DelBG_data <-read_excel("~/Documents/PhD/MSH2/20191113_yMSH2_244_alleles_Trial6/Enrich_Analysis/tsv/Deletion_Background_exp/main_barcodes_counts_4.xlsx", 
                                                 na = "NA", skip = 3) %>%
  replace(., is.na(.), 0) %>%
  gather(Sample_Name, Counts, 2:49) %>% 
  group_by(Sample_Name) %>%
  mutate(Frequency = Counts/ sum(Counts)) %>%
  separate(Sample_Name, c("Chemostat", "Selection","Timepoint"), sep = "_") %>%
  filter(Counts > 1)

DelBG_data$Timepoint <- as.numeric(DelBG_data$Timepoint)
#change to where you have the data file, or to the tab in supplemental file 3
Barcode_Variant_Map <- read_csv("~/Documents/PhD/MSH2/Msh2_Mutation_Rate/20200805_All_Barcodes_Unite.csv", 
                                col_types = cols(AlleleID = col_double(), 
                                                 Brian_Shirts = col_character(), ClinVar = col_character(), 
                                                 Clinical_significance_Last_reviewed = col_character(), 
                                                 FST_Human = col_character(), FST_NoHA = col_character(), 
                                                 GRCh37pos = col_double(), Human_AA = col_character(), 
                                                 Mut_AA = col_character(), Mutant_AA = col_character(), 
                                                 Mutation_Human = col_character(), 
                                                 Mutation_NHA = col_character(), Reference_AA = col_character(), 
                                                 Review_Stat_Number = col_double(), 
                                                 Review_Status_Long_Form = col_character(), 
                                                 Second_Mutation = col_character(), 
                                                 Second_Mutation_Human = col_character(), 
                                                 Second_Mutation_NHA = col_character(), 
                                                 Third_Mutation = col_character(), 
                                                 Third_Mutation_Human = col_character(), 
                                                 Third_Mutation_NHA = col_character(), 
                                                 VariationID = col_double(), chr = col_double(), 
                                                 match = col_character(), yAA_HA_Number = col_double(), 
                                                 yAA_HA_Number2 = col_double(), yAA_NoHA_Number = col_double(), 
                                                 y_AA = col_character()))

Barcode_Variant_Map_Split <- Barcode_Variant_Map %>%
  separate(Clinical_significance_Last_reviewed, c("Clin_sig", "Last_reviewed"), sep = ",") 

Barcode_Variant_Map_FST <- Barcode_Variant_Map %>% select(Barcode,FST_Mutations,Mutation) %>% distinct(Barcode,.keep_all = TRUE)

Barcode_Variant_NHA_Human <- Barcode_Variant_Map %>% select(FST_Mutations,FST_NoHA,FST_Human,Brian_Shirts,yAA_NoHA_Number) %>% distinct(FST_Mutations, .keep_all =TRUE)

#change to where you have the data file, or to the tab in supplemental file 3
Gammie_Chemostat_mutation_rates <- read_excel("~/Documents/PhD/MSH2/Gammie_MSH2_Pool_Trials/4_trials_combined_data_Can_Compare_Only.xlsx")

#change to where you have the data file, or to the tab in supplemental file 3
Gammie_Paper_Mutation_Rate_Data <- read_excel("~/Documents/PhD/MSH2/Gammie_MSH2_Pool_Trials/Gammie_Paper_Mutation_Rate_Data.xlsx")

#Data on CFUs 
#change to where you have the data file, or to the tab in supplemental file 3
DelBG_CFU_data <- read_excel("~/Documents/PhD/MSH2/20191113_yMSH2_244_alleles_Trial6/20191115_Additional_yMSH2_Trial_6.xlsx", 
                             sheet = "Sheet3") %>% gather(Selection,CFU, 2:3)

#Associated variant with barcodes 
DelBG_Variant <- full_join(DelBG_data, Barcode_Variant_Map_FST)

# All_Data_Combined including variants, Barcode counts, and CFU data 
DelBG_all_data <- right_join(DelBG_Variant,DelBG_CFU_data, by = c("Chemostat", "Timepoint","Selection"))


#Convert BarSeq frequencies into CFU Frequencies by multipling CFU from plating 
# times the frequency in the BarSeq 
Barcode_CFU_Data <- DelBG_all_data %>% 
  mutate(Barcode_CFU = Frequency*CFU) 
  

#Calculate the average read count for each Variant across the total
# and Can timepoints in each chemostat in order to filter by read count later
Average_Read_Count <- Barcode_CFU_Data %>%
  select(Barcode,Chemostat,Timepoint,Generations,Counts,Selection) %>%
  spread(Selection,Counts) %>%
  group_by(Barcode,Chemostat) %>%
  mutate(Mean_Can_Count = mean(Can, na.rm = TRUE)) %>%
  mutate(Mean_Total_Count = mean(Total, na.rm = TRUE)) %>%
  filter(Mean_Can_Count != 'NaN') %>%
  filter(Mean_Total_Count != 'NaN') %>%
  ungroup() %>%
  select(Barcode,Chemostat,Mean_Can_Count,Mean_Total_Count) %>%
  distinct()

#Normalized all CanR CFU by their total CFU, 
#filter out barcodes that don't have a mean read count of 40
Barcode_CFU_Normalized <- Barcode_CFU_Data %>%
  select(Barcode,Chemostat,Timepoint,Generations,Barcode_CFU,Selection) %>%
  spread(Selection,Barcode_CFU) %>% 
  mutate(Normalized_CanR_CFU = Can/Total) %>%
  filter(Normalized_CanR_CFU != "Inf") %>%
  filter(Normalized_CanR_CFU != "NaN")

#calculate mutation rate of all barcodes
Slopes <- Barcode_CFU_Normalized %>% # the %>% is a pipe essentially feed the results of this into the next function
  group_by(Chemostat,Barcode) %>%  #This tells the computer what subsets of data the slope shoud be calculated on 
  do(mod_lin = summary(lm(Normalized_CanR_CFU~Generations, data = .))) %>% # this calculating slope and outputs a list of all the info associated with the Lm function 
  mutate(intercept = mod_lin$coefficients[1], #mutate adds a column, where intercept, slope , Rsq are column headers, and you put the value associated with each barcode into a seperate column
         slope = mod_lin$coefficients[2],
         Rsq = mod_lin$r.squared) %>%
  select(-mod_lin) 

#filter out WT barcodes to determine number of reads cut off 
WT_Counts <- Slopes %>%
  left_join(Average_Read_Count) %>%
  left_join(Barcode_Variant_Map_FST) %>%
  filter(FST_Mutations == 'WT')

#Plotting for supplemental figure 2, plotting Mean Canavanine read count by the slope
#Slope should be the same due to all of them being WT barcodes
Can_Count_Cut_off <- ggplot(WT_Counts, aes(x=Mean_Can_Count, y = slope))
Can_Count_Cut_off +
  geom_point(alpha = .3) +
  theme_classic()+
  theme(axis.text.x = element_text(size = 20, color = "black"), 
        axis.text.y = element_text(size=20,color = "black",hjust = .2), 
        axis.title= element_text(size=20) ) +
  labs(x="Mean CanR Read Count",
       y= expression(paste("Mutation Rate at ",italic("CAN1"), "of WT Barcodes"))) +
  coord_cartesian(xlim = c(0,100), ylim = c(-.00005,.00005)) +
  geom_vline(aes(xintercept=40), color = "red") 

#Plotting for supplemental figure 2, plotting mean Non-selective read count by the slope
#Slope should be the same due to all of them being WT barcodes
Total_Count_Cut_off <- ggplot(WT_Counts, aes(x=Mean_Total_Count, y = slope))
Total_Count_Cut_off +
  geom_point(alpha = .3) +
  theme_classic()+
  theme(axis.text.x = element_text(size = 20, color = "black"), 
        axis.text.y = element_text(size=20,color = "black",hjust = .2), 
        axis.title= element_text(size=20) ) +
  labs(x="Mean Non-selective Read Count",
       y= expression(paste("Mutation Rate at ",italic("CAN1"), "of WT Barcodes"))) +
  coord_cartesian(xlim = c(0,100), ylim = c(-.00005,.00005)) +
  geom_vline(aes(xintercept=40), color = "red")


#Calculate fitness of all barcodes
CFU_Slopes <- DelBG_all_data %>% 
  filter(Selection == 'Total') %>% 
  mutate(lnfreq = log(Frequency)) %>%
  filter(lnfreq != '-Inf') %>% # the %>% is a pipe essentially feed the results of this into the next function
  group_by(Chemostat,Barcode) %>%  #This tells the computer what subsets of data the slope shoud be calculated on 
  do(mod_lin = summary(lm(lnfreq~Generations, data = .))) %>% # this calculating slope and outputs a list of all the info associated with the Lm function 
  mutate(CFU_intercept = mod_lin$coefficients[1], #mutate adds a column, where intercept, slope , Rsq are column headers, and you put the value associated with each barcode into a seperate column
         Comp_Fitness = mod_lin$coefficients[2],
         CFU_Rsq = mod_lin$r.squared) %>%
  select(-mod_lin) 

#Filter out barcodes that have an Rsq of 1, indicating only 2 timepoints
#Filter out barcodes with no competitive fitness measurement 
#Filter out barcodes without enough read coverage 
CFU_Slopes_Distinct <- CFU_Slopes %>%
  distinct() %>%
  filter(Comp_Fitness != 'NaN') %>%
  filter(CFU_Rsq < 1) %>%
  left_join(Slopes) %>%
  left_join(Barcode_Variant_Map_FST) %>%
  left_join(Average_Read_Count) %>%
  filter(Mean_Total_Count > 40) %>%
  filter(Mean_Can_Count > 40)


WT_Comp_Fitness <- CFU_Slopes_Distinct %>%
  filter(FST_Mutations == "WT")

#Calculate the lower and upper bound of acceptable fitness costs 
# Which is within 1std deviation of the median 
lower = median(CFU_Slopes_Distinct$Comp_Fitness) - sd(WT_Comp_Fitness$Comp_Fitness)
upper = median(CFU_Slopes_Distinct$Comp_Fitness) + sd(WT_Comp_Fitness$Comp_Fitness)

#plotting for Supplimental figure # 3 , a histogram of the competative fitness of
#all barcodes 
Fitness <- ggplot(CFU_Slopes_Distinct, aes(x= Comp_Fitness, col= "white"))
Fitness +
  geom_histogram(bins = 100, color = "black", fill = "white")+
  geom_vline(aes(xintercept=upper), color = "blue") + 
  geom_vline(aes(xintercept = lower), color = "blue") + 
  theme_classic()+
  theme(axis.text.x = element_text(size = 20, color = "black"), 
        axis.text.y = element_text(size=20,color = "black"), 
        axis.title= element_text(size=20) ) +
  labs(x="Competitive Fitness",
       y= "Number of Barcodes")

#Reformating data to be used in multi-comparison 
CFU_Columns <- CFU_Slopes_Distinct %>%
  filter(FST_Mutations == "WT") %>%
  select(Chemostat,Barcode,Comp_Fitness) %>%
  distinct() %>%
  spread(Chemostat,Comp_Fitness)

# functions for mapping data in Supplementary Figure 3
limitRange <- function(data, mapping, ...) { 
  ggplot(data = data, mapping = mapping, ...) + 
    geom_point(...,alpha =.1) +
    scale_y_continuous(limits = c(-.15, .15)) +
    scale_x_continuous(limits = c(-.15, .15)) 
}
# functions for mapping data in Supplementary Figure 3
limitRange2 <- function(data, mapping, ...) { 
  ggplot(data = data, mapping = mapping, ...) + 
    geom_density(...)  +
    scale_x_continuous(limits = c(-.15, .15)) 
}

#plotting data for Supplementary Figure 3 B
ggpairs(CFU_Columns,columns = 2:5,
        mapping = ggplot2::aes(alpha =.1),
        lower = list(continuous = limitRange),
        diag = list(continuous = limitRange2),
        upper = list(continuous = wrap("cor", method = "pearson",
                                       size = 9, color = "black")),
        columnLabels = c('Rep 1',"Rep 2", 'Rep 3', "Rep 4"),
        title = "Fitness Correlation Between WT Barcodes") +
  theme_classic() +
  theme(axis.text = element_text(size=15, colour = "black", family = "sans"),
        axis.title= element_text(size=15, colour = "black", family = "sans")) 

#Filtering mutation rate calculations by:
#Rsq less than 1 to take out perfect slopes that are because of only 2 timepoints 
#Barcodes with 1 std deviation outside of the median were filtered out 
#Barcodes with negative mutation rates were filtered out 
Slopes_Filtered <- Slopes %>%
  left_join(CFU_Slopes) %>%
  left_join(Barcode_Variant_Map_Split) %>%
  left_join(Average_Read_Count) %>%
  group_by(FST_Mutations) %>%
  filter(Mean_Can_Count > 40) %>%
  filter(Mean_Total_Count >40) %>%
  filter(Comp_Fitness > lower) %>%
  filter(Comp_Fitness < upper) %>%
  filter(Rsq <1) %>%
  filter(slope > 0)

#Figure out WT mutation rate for all Chemostats to calculate fold change
WT <- Slopes_Filtered %>%
  filter(FST_Mutations == 'WT')

WT_labels <- c("1","2","3", "4")

#Plotting for Figure #3 , where the mutation rates for the WT barcodes 
# are plotted in a box plot where the whiskers correspond to 1.5X the IQR
WT_Spread <- ggplot(WT, aes(x = Chemostat, y = slope))
WT_Spread +
  geom_boxplot(outlier.shape = NA) +
  geom_jitter(alpha =.5, width = .3)+
  #geom_point(position = 'jitter', alpha = .7) +
  theme_classic() +
  scale_x_discrete(labels=WT_labels) +
  scale_y_continuous(trans = "log2", n.breaks = 10,labels = label_scientific(digits = 2)) +
  theme(axis.text.x = element_text(size = 25, color = "black"), 
        axis.text.y = element_text(size=25,color = "black",hjust = .2), 
        axis.title= element_text(size=25),
        legend.title=element_text(size=25,face = "bold") ) +
  labs(x="Replicate",
       y= expression(atop("Mutation Rate at "*italic(CAN1),
                                  "Log"[2]~"axis")))

#Calculating the fold change of each Variant over WT in each chemostat 
# Slope is divided by value found in WT above for that chemostat 
F5_WT <- WT %>% filter(Chemostat == 'F5') 
F5_Median <- median(F5_WT$slope,na.rm = TRUE)
F6_WT <- WT %>% filter(Chemostat=='F6') 
F6_Median <- median(F6_WT$slope,na.rm = TRUE)
F10_WT <- WT %>% filter(Chemostat=='F10') 
F10_Median <- median(F10_WT$slope,na.rm = TRUE)
F11_WT <- WT %>% filter(Chemostat=='F11') 
F11_Median <- median(F11_WT$slope,na.rm = TRUE)


F5_Fold_change <- Slopes_Filtered %>%
  filter(Chemostat == 'F5') %>%
  mutate(Fold_Change = slope/F5_Median)

F6_Fold_change <- Slopes_Filtered %>%
  filter(Chemostat == 'F6') %>%
  mutate(Fold_Change = slope/F6_Median)

F10_Fold_change <- Slopes_Filtered %>%
  filter(Chemostat == 'F10') %>%
  mutate(Fold_Change = slope/F10_Median)

F11_Fold_change <- Slopes_Filtered %>%
  filter(Chemostat == 'F11') %>%
  mutate(Fold_Change = slope/F11_Median)  


#Combine all Fold Change calculations, and filter out extreme outliers
#4 fold under WT and 4 fold over the deletion 
Fold_Change <- full_join(F5_Fold_change,F6_Fold_change) %>% 
  full_join(F10_Fold_change) %>%
  full_join(F11_Fold_change)

Fold_Change_Filtered<- Fold_Change %>%
  filter(Fold_Change < 128) %>%
  filter(Fold_Change > .25) %>%
  group_by(FST_Mutations) %>%
  filter(n() >3)

#Reformating for graphing
Fold_Change_Columns <- Fold_Change_Filtered %>%
  select(Chemostat,Barcode,Fold_Change,Clin_sig) %>%
  distinct() %>%
  spread(Chemostat,Fold_Change)

#functions for graphing
limitRange3 <- function(data, mapping, ...) { 
  ggplot(data = data, mapping = mapping, ...) + 
    geom_point(..., alpha =.1) +
    scale_y_continuous(trans = "log2",n.breaks = 6,
                       labels = function(x) ifelse(x == 0, "0", x), limits = c(.25,128)) +
    scale_x_continuous(trans = "log2",n.breaks = 6,
                       labels = function(x) ifelse(x == 0, "0", x), limits = c(.25,128)) +
    labs( x = "Fold Change Over WT",
          y = "Fold Change Over WT")
}

#functions for graphing
limitRange4 <- function(data, mapping, ...) { 
  ggplot(data = data, mapping = mapping, ...) + 
    geom_density(...)  +
    scale_x_continuous(trans = "log2",n.breaks = 6,
                       labels = function(x) ifelse(x == 0, "0", x), limits = c(.25,128)) +
    labs(y = "Frequency")
}

#Graphing for Supplementary figure #4, correlation between biological replicates
# of the mutation rate fold change
ggpairs(Fold_Change_Columns,columns = 4:7,
        lower = list(continuous = limitRange3),
        diag = list(continuous = limitRange4),
        upper = list(continuous = wrap("cor", method = "spearman",
                                       size = 9, color = "black", family = "sans" )),
        columnLabels = c('Rep 1',"Rep 2", 'Rep 3', "Rep 4"),
        title = "Fold change correlation of barcodes between replicates") +
  theme_classic() +
  theme(axis.text = element_text(size=12, colour = "black", family = "sans"),
        axis.title= element_text(size=15, colour = "black", family = "sans"),
        axis.text.x = element_text(angle = 60, vjust = .8, hjust = .6))


#graphing for Supplementary figure 6 , comparing Competitive fitness by the mutation rate
comp_Fitness_Fold_Change <- ggplot(Fold_Change_Filtered, aes(x=Comp_Fitness, y= Fold_Change))
comp_Fitness_Fold_Change +
  geom_point(alpha =.1) +
  theme_classic() +
  theme(axis.text.x = element_text(size = 20, color = "black"), 
        axis.text.y = element_text(size=20,color = "black" )) +
  labs( x="Competitive Fitness",
        y= "Fold Change over WT") 

#Zoom in 
comp_Fitness_Fold_Change +
  geom_point(alpha = .1) +
  theme_classic() +
  coord_cartesian(ylim = c(0,10))+ 
  theme(axis.text.x = element_text(size = 20, color = "black"), 
        axis.text.y = element_text(size=20,color = "black" )) +
  labs( x="Competitive Fitness",
       y= "Fold Change over WT")
  

# determining the significance of the Fold change of a variant in comparison
# to the average fold change of the WT barcodes (which are essentially 1)
#Using a pairwise wilcoxian rank sum test because data is not normally distributed
# Benjamini- Hochberg correction for multiple hypothesis testing 
Wilcox_signficance_Fold_Change <- Fold_Change_Filtered  %>%
  as.data.frame() %>%
  pairwise_wilcox_test(Fold_Change~FST_Mutations, 
                       ref.group = "WT",
                       p.adjust.method = "BH")

Wilcox_signficance <- Wilcox_signficance_Fold_Change %>%
  group_by(group2)

Fold_Change_Signficance <- left_join(Fold_Change_Filtered,Wilcox_signficance_Fold_Change, by = c("FST_Mutations" = "group2")) 

#Calculate the median fold change for each variant across all experiments
Median_Fold_Change <- Fold_Change_Signficance %>%
  group_by(FST_Mutations) %>%
  mutate(Median_Fold_Change = median(Fold_Change, na.rm = TRUE)) %>%
  ungroup()

#Calculate Median Fold change by each biological replicate
#filter out barcodes that aren't represented at least 3 times
Median_Fold_Change_By_Chemostat <-Fold_Change_Signficance %>%
  group_by(FST_Mutations,Chemostat) %>%
  filter(n()>3) %>%
  mutate(Median_Fold_Change = median(Fold_Change, na.rm = TRUE)) %>%
  ungroup()
  
#Reformating 
Median_Fold_Change_Columns <- Median_Fold_Change_By_Chemostat %>%
  select(Chemostat,FST_Mutations,Median_Fold_Change,Clin_sig) %>%
  distinct() %>%
  spread(Chemostat,Median_Fold_Change)

limitRange5 <- function(data, mapping, ...) { 
  ggplot(data = data, mapping = mapping, ...) + 
    geom_point(..., alpha =.1) +
    scale_y_continuous(trans = "log2",n.breaks = 6,
                       labels = function(x) ifelse(x == 0, "0", x), limits = c(.25,64)) +
    scale_x_continuous(trans = "log2",n.breaks = 6,
                       labels = function(x) ifelse(x == 0, "0", x), limits = c(.25,64)) +
    labs( x = "Fold Change Over WT",
          y = "Fold Change Over WT")
}

limitRange6 <- function(data, mapping, ...) { 
  ggplot(data = data, mapping = mapping, ...) + 
    geom_density(...)  +
    scale_x_continuous(trans = "log2",n.breaks = 6,
                       labels = function(x) ifelse(x == 0, "0", x), limits = c(.25,64)) +
    labs(y = "Frequency")
}

#plotting for supplementary figure 4B, Median fold change of each variant by chemostat 
ggpairs(Median_Fold_Change_Columns,columns = 3:6,
        lower = list(continuous = limitRange5),
        diag = list(continuous = limitRange6),
        upper = list(continuous = wrap("cor", method = "spearman",
                                       size = 9, color = "black", family = "sans" )),
        columnLabels = c('Rep 1',"Rep 2", 'Rep 3', "Rep 4"),
        title = "Fold change correlation of variants between replicates") +
  theme_classic() +
  theme(axis.text = element_text(size=12, colour = "black", family = "sans"),
        axis.title= element_text(size=15, colour = "black", family = "sans"),
        axis.text.x = element_text(angle = 60, vjust = .8, hjust = .6))


Median_Fold_Change_Wilcox_Select <- Median_Fold_Change %>%
  select(FST_Mutations, FST_Human,Clin_sig,Median_Fold_Change,p,p.adj,p.adj.signif)


#Comparison of unbarcoded pool to the barcoded pool 
Gammie_CLinVar <- left_join(Gammie_Chemostat_mutation_rates,Median_Fold_Change, by =c( "Mutation"= "FST_NoHA" )) %>%
  left_join(Gammie_Paper_Mutation_Rate_Data) %>%
  filter(Barcode != "NA")

#Table comparing values found of the same variants in the barcoded
# vs non barcoded variants for supplemental table 3. 
Gammie_ClinVar_Summary <- group_by(Gammie_CLinVar, Mutation) %>%
  summarise(
    yAA_posistion = yAA_NoHA_Number,
    Count = n(),
    Median_Foldchange = median(Fold_Change, na.rm = TRUE),
    Mean_NoBarcode = mean(Value, na.rm = TRUE),
    Mean_Barcode = mean(slope, na.rm = TRUE),
    Median_Foldchange = median(Fold_Change, na.rm = TRUE),
    Gammie_Fold_Change = `Fold induction CAN`,
    Gammie_Result = Gammie_Result,
    Adjusted_p_value = p.adj,
    Significant = p.adj.signif
  ) %>%
  distinct()

write_excel_csv(Gammie_ClinVar_Summary,"~/Documents/PhD/MSH2/20191113_yMSH2_244_alleles_Trial6/unbarcoded_by_barcoded.csv")


#Summary of the fold change found of all variants in the barcoded pool 
#for supplemental table 2
All_Variants_Summary <- group_by(Median_Fold_Change, FST_Mutations) %>%
  summarise(
    `Human Genotype` = FST_Human,
    yAA_Number = yAA_NoHA_Number,
    AlleleID = AlleleID,
    VariationID = VariationID,
    count = n(),
    `Median Fold Change Over WT` = median(Fold_Change, na.rm = TRUE),
    IQR = IQR(Fold_Change),
    `log2(Median Fold Change)` = log2(median(Fold_Change, na.rm = TRUE)),
    `95% Confidence Interval`= 1.96*(sd(log2(Fold_Change)))/sqrt(length(Fold_Change)),
    Significant = p.adj.signif,
    `ClinVar Determination` = Clin_sig,
    `Star Rating` = Review_Stat_Number) %>%
  distinct()

write_excel_csv(All_Variants_Summary,"All_Variants_Summary.csv")

All_ClinVar <- Median_Fold_Change %>%
  filter(FST_Human != 'NA') %>%
  filter(is.na(Second_Mutation)) %>%
  as.data.frame()

All_Clinvar_barcode <- All_ClinVar %>%
  distinct(Barcode,.keep_all = TRUE) %>%
  count(FST_Mutations)

median(All_Clinvar_barcode$n)

#plotting for supplementary figure 7 
Barcode_Coverage <- ggplot(All_Clinvar_barcode, aes(x=n))
Barcode_Coverage +
  geom_histogram( bins = 20, color = "black", fill = "grey")+
  theme_classic() +
  theme(axis.text.x = element_text(size = 20, color = "black"), 
        axis.text.y = element_text(size=20,color = "black"), 
        axis.title= element_text(size=20,color = "black") ) + 
  labs( x="Number of Barcodes per Variant",
        y="Number of Variants") 
  
#Testing whether a log2 transformation makes 
#values normally distributed 
df.shapiro <- All_ClinVar %>%
  mutate(log2foldchange = log2(Fold_Change)) %>%
  group_by(FST_Mutations) %>%
  mutate(N_Samples = n()) %>%
  nest() %>%
  mutate(Shapiro = map(data, ~ shapiro.test(.x$log2foldchange)$p.value) %>% as.numeric())

non_poisson <- df.shapiro %>%
  filter(Shapiro < .05)

# comparison of Jia et al 2021 data set to this study's data set. Data 
# downloaded as part of Jia et al 2021. 
Jia_msh2_DMS <- read_excel("~/Documents/PhD/MSH2/Jia_msh2_DMS.xlsx", 
                           sheet = "TableS5_AllVariants") 

Jia_Ollodart <- All_Variants_Summary %>%
  select(`Human Genotype`,`log2(Median Fold Change)` ) %>%
  left_join(Jia_msh2_DMS, by= c("Human Genotype"="Variant"))

Jia_by_Ollodart <- ggplot(Jia_Ollodart,aes(x= `log2(Median Fold Change)` ,y=`LOF score`))

Jia_by_Ollodart +
  geom_point(size = 2) +
  theme_classic() +
  theme(axis.text.x = element_text(size = 20, color = "black"), 
        axis.text.y = element_text(size=20,color = "black" ),
        axis.title= element_text(size=20, color = "black")) +
  scale_y_continuous(n.breaks = 8) +
  scale_x_continuous(n.breaks = 8)+
  labs( x="Ollodart"~italic("et al.")~"2021 Score",
        y= "Jia"~italic("et al.")~"2021 Score")

#Summary for Table 3 
Brian_Shirts_Log2 <- group_by(All_ClinVar, FST_Human) %>%
  filter(Brian_Shirts != "NA") %>%
  summarise(
    AlleleID = AlleleID,
    VariationID = VariationID,
    count = n(),
    `log2(Median Fold Change)` = log2(median(Fold_Change, na.rm = TRUE)),
    `95% Confidence Interval`= 1.96*(sd(log2(Fold_Change)))/sqrt(length(Fold_Change)),
    Significant = p.adj.signif,
    `Initial clinical classification` = Clin_sig) %>%
  distinct()

write_excel_csv(Brian_Shirts_Log2,"~/Documents/PhD/MSH2/20191113_yMSH2_244_alleles_Trial6/UW_Lab_Med_Variants_Results.csv")

Clinvar_only_VUS <- Median_Fold_Change %>%
  filter(FST_Human != 'NA') %>%
  filter(is.na(Second_Mutation)) %>%
  filter(Clin_sig == "Conflicting interpretations of pathogenicity" |
           Clin_sig == "Uncertain significance" |
           Clin_sig == "UW Lab Med" ) %>%
  as_tibble()

#Summary for Table 2
VUS_Summary_sign <- Clinvar_only_VUS %>%
  filter(p.adj.signif != "ns") %>%
  reorder_levels(yAA_NoHA_Number) %>%
  group_by(FST_Human) %>%
  summarise(
    `Human Variant` = FST_Human,
    `Yeast Variant` = FST_NoHA,
    `Allele ID` = AlleleID,
    Count = n(),
    `Median Fold Change Over WT` = median(Fold_Change, na.rm = TRUE),
    IQR = IQR(Fold_Change),
    `Adjusted p value` = p.adj,
    Significant = p.adj.signif
  ) %>%
  distinct() %>%
  ungroup() %>%
  select(-FST_Human) %>%
  as.data.frame()

write_excel_csv(VUS_Summary_sign,"~/Documents/PhD/MSH2/20191113_yMSH2_244_alleles_Trial6/Significant_VUS.csv")
  

# filtering for all known pathogenicity ClinVar alleles. M453K is an allele
#that has a known pathogenicity score but the pathogencity is caused by 
#abberant splicing, not the AA change. 
All_ClinVar_novus <- All_ClinVar %>%
  filter(Clin_sig != "Uncertain significance") %>%
  filter(Clin_sig != "Conflicting interpretations of pathogenicity") %>%
  filter(Clin_sig != "UW Lab Med") %>%
  filter(Review_Stat_Number > 1) %>%
  filter(FST_Human != "M453K")
  
# Generating labels for all the following plots of the signficance calculations
Sig_labels <- All_ClinVar %>% 
  group_by(FST_Human)%>%
  summarise(
    label_position=max(Fold_Change),
    label_value= max(p.adj.signif),
    Clin_sig = max(Clin_sig)
  )

Sig_labels_only_Vus <- Clinvar_only_VUS %>% 
  group_by(FST_Human)%>%
  summarise(
    label_position=max(Fold_Change),
    label_value= max(p.adj.signif),
    Clin_sig = max(Clin_sig)
  )

Sig_labels_no_Vus <- All_ClinVar_novus %>% 
  group_by(FST_Human)%>%
  summarise(
  label_position=max(Fold_Change),
  label_value= max(p.adj.signif),
  Clin_sig = max(Clin_sig)
)

# Plotting all known pathogenicity alleles for Figure 3B 
All_grouped_novus <- ggplot(All_ClinVar_novus,
  aes(x=reorder(FST_Human,Median_Fold_Change),y=Fold_Change, 
  group=FST_Human, col= Clin_sig))


All_grouped_novus +
  geom_boxplot(lwd=1.2,outlier.shape = NA) +
  geom_point(size = 2)+
  geom_text(data=Sig_labels_no_Vus, aes(x=FST_Human, y=label_position,label=label_value),vjust=-.5)+
  scale_color_manual(values=c("Blue", "darkorange2","Red","grey")) +
  scale_fill_manual(values=c("Blue", "darkorange2","Red","grey"))+
  theme_classic() +
  theme(axis.text.x = element_text(angle=60, vjust=1,hjust = 1, size = 20, color = "black"), 
        axis.text.y = element_text(size=20,color = "black"), 
        axis.title= element_text(size=25),
        legend.title=element_text(size=20,face = "bold") ) + 
  scale_y_continuous(trans = "log2",n.breaks = 15, labels = function(x) ifelse(x == 0, "0", x)) + 
  theme(legend.position = c(.15,.9),legend.text = element_text(size =20))+
  labs( x="Human Msh2 Variant",
       y=expression(atop("Fold Change over WT",
                         "Log"[2]~"axis")),
       col = "ClinVar Classification")

#plotting the unbarcoded experiment for Figure 2
All_Gammie <- ggplot(Gammie_Chemostat_mutation_rates,aes(x=reorder(Mutation,Value), y=Value, group=Mutation , col = Gammie_Result))
All_Gammie +
  geom_boxplot(lwd=1.2,outlier.shape = NA) +
  geom_point(size = 2) +
  scale_color_manual(values = c("Red","Blue"))+
  theme_classic() +
  scale_y_continuous(trans = "log2", n.breaks = 12,labels = label_scientific(digits = 2)) + 
  theme(axis.text.x = element_text(angle=60, vjust=1,hjust = 1, size = 15, color = "black"), 
        axis.text.y = element_text(size=20,color = "black"), 
        axis.title= element_text(size=25),
        legend.title=element_text(size=20,face = "bold")) +
  theme(legend.position = c(.2,.7),legend.text = element_text(size =20))+
  labs(x="Yeast Msh2 Variant",
       y= expression(atop("Mutation Rate at "~italic("CAN1"),
                          "Log"[2]~"axis")),
       col = "Gammie"~italic("et al.")~"2007 finding" )

#creating supplemental table 1 
Gammie_All_Data <- left_join(Gammie_Chemostat_mutation_rates,Gammie_Paper_Mutation_Rate_Data)

Gammie_Summary <- group_by(Gammie_All_Data, Mutation) %>%
  summarise(
    `pAG Number` = pAG_Number,
    Count = n(),
    `Mutation Rate` = median(Value, na.rm = TRUE),
    IQR = IQR(Value),
    `Gammie Mutation Rate` = Gammie_Mutation_Rate,
    `Gammie Phenotype` = Gammie_Result,
  ) %>%
  distinct()

write_excel_csv(Gammie_Summary, "Gammie_Summary.csv")
